# Supplementary material for: Linear doggybone DNA vaccine induces similar immunological responses to conventional plasmid DNA independently of immune recognition by TLR9 in a pre-clinical model
Source: Springer Nature journal article supplement (doi:10.1007/s00262-017-2111-y), 2018-01-12
Supplement: MOESM1 [file 15361552]

**Supplementary table 1.** Overlapping peptide pools for E6 and E7 antigens encoded by DB and PL. Mutations are in red; in bold are peptides corresponding to the linker sequence.

|               | Peptide no | aa seq                   |
|---------------|------------|--------------------------|
| <b>pool 1</b> | 1          | MHGDTPTLHEYMLDL          |
|               | 2          | TPTLHEYMLDLQPET          |
|               | 3          | HEYMLDLQPETTDLY          |
|               | 4          | LDLQPETTDLY <b>GYGQ</b>  |
|               | 5          | PETTDLY <b>GYGQLNDS</b>  |
| <b>pool 2</b> | 6          | DLY <b>GYGQLNDSSEEE</b>  |
|               | 7          | Y <b>GQLNDSSEEE</b> DEID |
|               | 8          | NDSSEEEDEIDGPAG          |
|               | 9          | EEDEIDGPAGQAEP           |
|               | 10         | EIDGPAGQAEPDRAH          |
| <b>pool 3</b> | 11         | PAGQAEPDRAHYNIV          |
|               | 12         | AEPDRAHYNIVTFCC          |
|               | 13         | RAHYNIVTFCCCKDS          |
|               | 14         | NIVTFCCCKDSTLRL          |
|               | 15         | FCCKCDSTLRRCVQS          |
| <b>pool 4</b> | 16         | CDSTLRRCVQSTHVD          |
|               | 17         | LRLCVQSTHVDIRTL          |
|               | 18         | VQSTHVDIRTLEDLL          |
|               | 19         | HVDIRTLEDLLMGTL          |
|               | 20         | RTLEDLLMGTLGIVC          |
| <b>pool 5</b> | 21         | DLLMGTLGIVCPICS          |
|               | 22         | GTLGIVCPICSQK <b>PG</b>  |
|               | 23         | IVCPICSQK <b>PGGGSS</b>  |
|               | 24         | ICSQK <b>PGGGSSGGGS</b>  |
|               | 25         | K <b>PGGGSSGGSGMFQ</b>   |
| <b>pool 6</b> | 26         | <b>GSSGGSGMFQDPQE</b>    |
|               | 27         | <b>GGSGMFQDPQERPRK</b>   |
|               | 28         | MFQDPQERPRKLPQL          |
|               | 29         | PQERPRKLPQLCTEL          |
|               | 30         | PRKLPQLCTELQTTI          |
| <b>pool 7</b> | 31         | PQLCTELQTTIHDII          |
|               | 32         | TELQTTIHDIIILECV         |
|               | 33         | TTIHDIIILECVYCKQ         |
|               | 34         | DIILECVYCKQQLLR          |
|               | 35         | ECVYCKQQLLRREVY          |
| <b>pool 8</b> | 36         | CKQQLLRREVYDFAR          |
|               | 37         | LLRREVYDFARRDLC          |
|               | 38         | EVYDFARRDLCIVYR          |

|                |    |                 |
|----------------|----|-----------------|
|                | 39 | FARRDLCIVYRDGNP |
|                | 40 | DLCIVYRDGNPYAVR |
| <b>pool 9</b>  | 41 | VYRDGNPYAVRDKCL |
|                | 42 | GNPYAVRDKCLKFY  |
|                | 43 | AVRDKCLKFYKISE  |
|                | 44 | KCLKFYKISEYRHY  |
|                | 45 | FYKISEYRHYCYSL  |
| <b>pool 10</b> | 46 | ISEYRHYCYSLYGTT |
|                | 47 | RHYCYSLYGTTLEQQ |
|                | 48 | YSLYGTTLEQQYNKP |
|                | 49 | GTTLEQQYNKPLCDL |
|                | 50 | EQQYNKPLCDLLIRC |
| <b>pool 11</b> | 51 | NKPLCDLLIRCINRQ |
|                | 52 | CDLLIRCINRQKPLC |
|                | 53 | IRCINRQKPLCPEEK |
|                | 54 | NRQKPLCPEEKQRHL |
|                | 55 | PLCPEEKQRHLDKKQ |
|                | 56 | EKQRHLDKKQRFHN  |
| <b>pool 12</b> | 57 | RHLDKKQRFHNIRGR |
|                | 58 | KKQRFHNIRGRWTGR |
|                | 59 | FHNIRGRWTGRMSC  |
|                | 60 | RGRWTGRMSCCRSS  |
|                | 61 | TGRMSCCRSSRTRR  |
|                | 62 | MSCCRSSRTRRETQL |

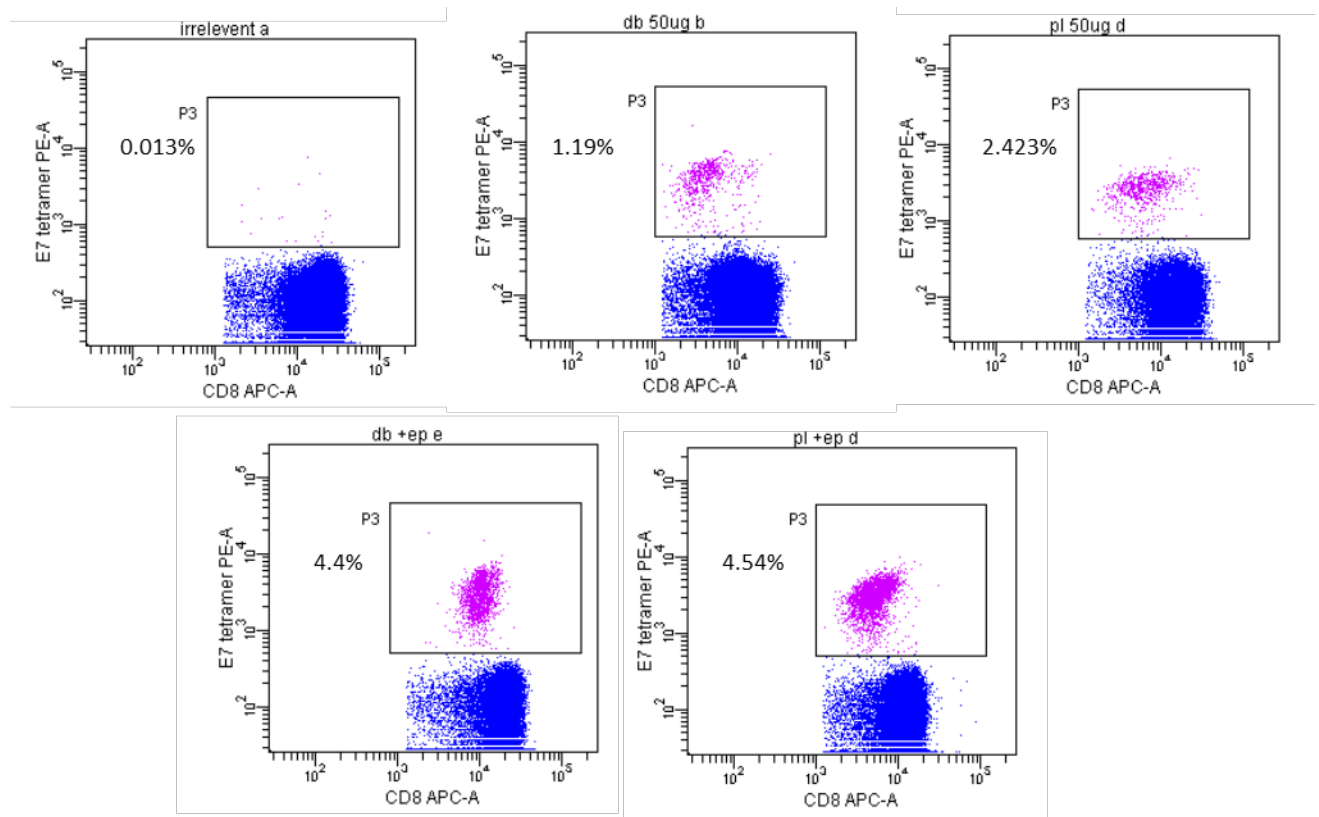

**Supplementary figure 1.** Representative tetramer staining for DB and PL groups with or without EP alongside of irrelevant DB control. Mice were injected i.m. with 50 $\mu$ g of the E6E7 DB or PL vaccines with or without electroporation and CD8+ responses were measured in blood samples taken after priming on d 14 using PE-labelled H2-Db-E7<sub>49-57</sub> tetramer. Values are tetramer positive cells as a percentage of total CD8+ cells.

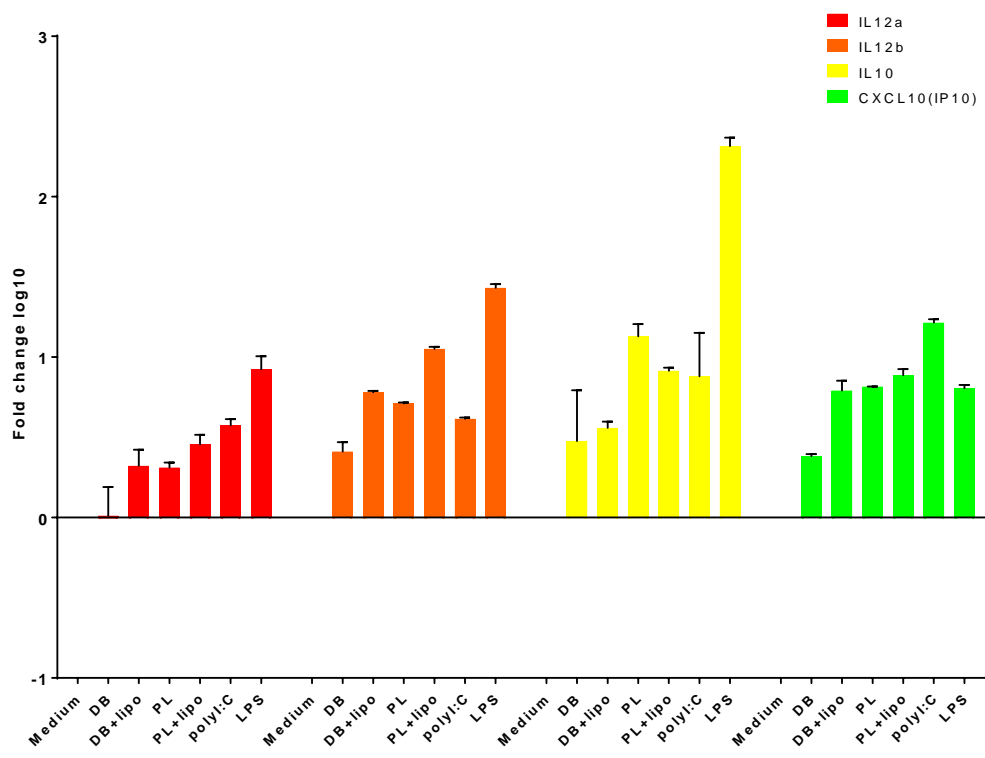

**Supplementary figure 2.** BMDCs from WT mice were stimulated with 1  $\mu\text{g/ml}$  of DB or PL with 1  $\mu\text{g/ml}$  lipofectamine 2000 (lipo) or without. LPS and poly(I:C) were used as controls at a final concentration of 1  $\mu\text{g/ml}$ . After 20 h following the treatments, cells were collected and mRNA was isolated. mRNA levels of inflammatory cytokines released by BMDCs were measured. The error bars are standard deviations.
